# Supplementary material for: The Use of Dog Collars Offers Significant Benefits to Rabies Vaccination Campaigns: The Case of Zanzibar, Tanzania
Source: MDPI journal article supplement (doi:10.3390/tropicalmed8080421), 2023-08-21
Supplement: s1 [file s1]

| District | Shehia name      | Required # of surveys | # of surveys undertaken | Date dogs vaccinated | Date survey undertaken | Days between events |
|----------|------------------|-----------------------|-------------------------|----------------------|------------------------|---------------------|
| North A  | Chaani masingini | 10                    | 10                      | 28-Nov-22            | 04-Feb-23              | 68                  |
| North A  | Kigunda          | 10                    | 10                      | 08-Dec-22            | 08-Feb-23              | 62                  |
| North A  | Kijini           | 10                    | 10                      | 06-Dec-22            | 06-Feb-23              | 62                  |
| North A  | Kinyasini        | 10                    | 10                      | 29-Nov-22            | 06-Feb-23              | 69                  |
| North A  | Matemwe          | 10                    | 10                      | 05-Dec-22            | 07-Feb-23              | 64                  |
| North A  | Mkwajuni         | 10                    | 10                      | 01-Dec-22            | 09-Feb-23              | 70                  |
| North A  | Mto wa pwani     | 10                    | 10                      | 02-Dec-22            | 09-Feb-23              | 69                  |
| North A  | Pwani mchangani  | 10                    | 10                      | 13-Dec-22            | 07-Feb-23              | 56                  |
| North B  | Donge Mtambile   | 10                    | 10                      | 05-Dec-22            | 09-Feb-23              | 66                  |
| North B  | Kitope           | 10                    | 10                      | 30-Nov-22            | 08-Feb-23              | 70                  |
| North B  | Kiwengwa         | 10                    | 10                      | 15-Dec-22            | 13-Feb-23              | 60                  |
| North B  | Mafufuni         | 10                    | 10                      | 06-Dec-22            | 03-Feb-23              | 59                  |
| North B  | Mkataleni        | 10                    | 10                      | 01-Dec-22            | 02-Feb-23              | 63                  |
| North B  | Pangeni          | 10                    | 10                      | 02-Dec-22            | 13-Feb-23              | 73                  |
| North B  | Zingwe Zingwe    | 10                    | 10                      | 12-Dec-22            | 07-Feb-23              | 57                  |
| Central  | Bungi            | 15                    | 15                      | 01-Dec-22            | 09-Feb-23              | 70                  |
| Central  | Charawe          | 15                    | 16                      | 29-Nov-22            | 13-Feb-23              | 76                  |
| Central  | Dunga kiembeni   | 15                    | 16                      | 13-Dec-22            | 02-Feb-23              | 51                  |
| Central  | Koani            | 15                    | 15                      | 15-Dec-22            | 06-Feb-23              | 53                  |
| Central  | Mchangani        | 15                    | 16                      | 09-Dec-22            | 07-Feb-23              | 60                  |
| Central  | Mgeni haji       | 15                    | 15                      | 12-Dec-22            | 05-Feb-23              | 55                  |
| Central  | Miwani           | 15                    | 15                      | 14-Dec-22            | 14-Feb-23              | 62                  |
| Central  | Ndijani mseweni  | 15                    | 15                      | 07-Dec-22            | 08-Feb-23              | 63                  |
| Central  | Pagali           | 15                    | 15                      | 09-Dec-22            | 05-Feb-23              | 58                  |
| Central  | Tindini          | 15                    | 15                      | 30-Nov-22            | 09-Feb-23              | 71                  |

|         |                    |    |    |           |           |    |
|---------|--------------------|----|----|-----------|-----------|----|
| Central | Uroa               | 15 | 15 | 05-Dec-22 | 15-Feb-23 | 72 |
| West A  | Bububu             | 10 | 10 | 30-Nov-22 | 08-Feb-23 | 70 |
| West A  | Chuini             | 10 | 10 | 12-Dec-22 | 07-Feb-23 | 57 |
| West A  | Kianga             | 10 | 10 | 14-Dec-22 | 02-Feb-23 | 50 |
| West A  | Kizimbani          | 10 | 10 | 29-Nov-22 | 02-Feb-23 | 65 |
| West A  | Mfenesini          | 10 | 10 | 06-Dec-22 | 06-Feb-23 | 62 |
| West A  | Mtopepo            | 10 | 10 | 22-Dec-22 | 03-Feb-23 | 43 |
| West A  | Mwakaje            | 10 | 10 | 13-Dec-22 | 06-Feb-23 | 55 |
| West A  | Mwera              | 10 | 10 | 01-Dec-22 | 01-Feb-23 | 62 |
| West B  | Dimani             | 10 | 10 | 16-Dec-22 | 06-Feb-23 | 52 |
| West B  | Fumba              | 10 | 10 | 19-Dec-22 | 06-Feb-23 | 49 |
| West B  | Fuoni Kibondeni    | 10 | 10 | 04-Dec-22 | 07-Feb-23 | 65 |
| West B  | Fuoni Kijito Upele | 10 | 10 | 30-Nov-22 | 03-Feb-23 | 65 |
| West B  | Kombeni            | 10 | 10 | 16-Dec-22 | 05-Feb-23 | 51 |
| West B  | Pangawe            | 10 | 10 | 30-Nov-22 | 03-Feb-23 | 65 |
| West B  | Shakani            | 10 | 10 | 15-Dec-22 | 05-Feb-23 | 52 |
| West B  | Tomondo            | 10 | 12 | 28-Nov-22 | 08-Feb-23 | 72 |
| South   | Dongwe             | 10 | 10 | 01-Dec-22 | 07-Feb-23 | 68 |
| South   | Kajengwa           | 10 | 11 | 02-Dec-22 | 02-Feb-23 | 62 |
| South   | Kibuteni           | 10 | 10 | 07-Dec-22 | 08-Feb-23 | 63 |
| South   | Muyuni B           | 10 | 10 | 13-Dec-22 | 06-Feb-23 | 55 |
| South   | Paje               | 10 | 10 | 02-Dec-22 | 02-Feb-23 | 62 |
| South   | Kitogani           | 10 | 10 | 06-Dec-22 | 05-Feb-23 | 61 |
| Urban   | Amani              | 5  | 6  | 29-Nov-22 | 03-Feb-23 | 66 |
| Urban   | Karakana           | 5  | 7  | 28-Nov-22 | 07-Feb-23 | 71 |
| Urban   | Kikwajuni Juu      | 5  | 6  | 06-Dec-22 | 08-Feb-23 | 64 |

|       |          |   |    |           |           |    |
|-------|----------|---|----|-----------|-----------|----|
| Urban | Kilimani | 5 | 9  | 08-Dec-22 | 04-Feb-23 | 58 |
| Urban | Kiponda  | 5 | 5  | 07-Dec-22 | 05-Feb-23 | 60 |
| Urban | Makadara | 5 | 12 | 30-Nov-22 | 06-Feb-23 | 68 |
| Urban | Mpendae  | 5 | 7  | 08-Dec-22 | 04-Feb-23 | 58 |
| Urban | Rahaleo  | 5 | 7  | 05-Dec-22 | 06-Feb-23 | 63 |
