# Supplementary material for: The Use of Dog Collars Offers Significant Benefits to Rabies Vaccination Campaigns: The Case of Zanzibar, Tanzania
Source: MDPI journal article supplement (doi:10.3390/tropicalmed8080421), 2023-08-21
Supplement: s1 [file s1]

## Questionnaire

**Has the respondent agreed to take part in the survey voluntarily? (“Yes only” box)**

**Date of survey:** .....

**Shehia name:** .....

**District:** .....

**Age of Respondent:** .....

**Sex of Respondent:** .....

| S.no                                                               | Question                                                                                                                                                                                                     | Responses                                                                                                                                                                                             | Skip Pattern                                                                                                           |
|--------------------------------------------------------------------|--------------------------------------------------------------------------------------------------------------------------------------------------------------------------------------------------------------|-------------------------------------------------------------------------------------------------------------------------------------------------------------------------------------------------------|------------------------------------------------------------------------------------------------------------------------|
| <b>Section A: General observation of vaccinated community dogs</b> |                                                                                                                                                                                                              |                                                                                                                                                                                                       |                                                                                                                        |
| A.1                                                                | Have you seen any dogs wearing collars around their neck in your community?                                                                                                                                  | 1 - Yes<br>2 - No                                                                                                                                                                                     | <ul style="list-style-type: none"> <li>• If “1”, go to Question A.2.</li> <li>• If “2”, go to Question B.1.</li> </ul> |
| A.2                                                                | Please describe what the collars looked like that you saw on the dogs in your community?<br><br><i>The surveyor will not give the answer and will not provide any guiding information to the respondent.</i> | 1 – Any mention of plastic collars that are bright in color (i.e., “rabies vaccination collar”)<br><br>2 – Normal dog collars (i.e., NOT “rabies vaccination collar”)                                 | <ul style="list-style-type: none"> <li>• If “1”, go to Question A.3.</li> <li>If “2”, go to Question B.1</li> </ul>    |
| A.3                                                                | Do you know what it means when a dog wears a plastic collar that is bright in color?<br><br><i>The surveyor will not give the answer and will not provide any guiding information to the respondent.</i>     | 1 – The dog is vaccinated against rabies.<br>2 – The dog has been given an injection (rabies vaccination not mentioned specifically).<br>3 – The dog is healthy.<br>4 - The dog has a specific owner. |                                                                                                                        |

|                                                        |                                                                                                          |                                                                                                                                                                                                                                                                                 |  |
|--------------------------------------------------------|----------------------------------------------------------------------------------------------------------|---------------------------------------------------------------------------------------------------------------------------------------------------------------------------------------------------------------------------------------------------------------------------------|--|
|                                                        |                                                                                                          | 5 – Other (please specify).                                                                                                                                                                                                                                                     |  |
| <b>Section B: General perception of community dogs</b> |                                                                                                          |                                                                                                                                                                                                                                                                                 |  |
| B.1                                                    | How do you feel if you encounter a dog <u>with</u> a bright colored collar in the community?             | <p>1 - I feel safer around dogs with those collars.</p> <p>2 - No change in perception (neither safer nor more at-risk).</p> <p>3 – I feel less safe around dogs with those collars.</p>                                                                                        |  |
| B.2                                                    | If you see a dog <u>with</u> a bright colored collar in the community, how would you typically react?    | <p>1 - Try to stay away from it.</p> <p>2 - Try to chase it away (e.g., throwing something at it or trying to hit it with something).</p> <p>3 – Interact with it (e.g., touching, petting, etc.).</p> <p>4 – No reaction (e.g., any indifferent action like ignoring them)</p> |  |
| B.3                                                    | How do you feel if you encounter a dog <u>without</u> a bright colored collar in the community?          | <p>1 - I feel safer around dogs without collars.</p> <p>2 - No change in perception (neither safer nor more at-risk).</p> <p>3 – I feel less safe around dogs without collars.</p>                                                                                              |  |
| B.4                                                    | If you see a dog <u>without</u> a bright colored collar in the community, how would you typically react? | <p>1 - Try to stay away from it.</p> <p>2 - Try to chase it away (e.g., throwing something at it or</p>                                                                                                                                                                         |  |

|                                           |                                                                                                                                                                  |                                                                                                                                                                                                       |                                                                                                                               |
|-------------------------------------------|------------------------------------------------------------------------------------------------------------------------------------------------------------------|-------------------------------------------------------------------------------------------------------------------------------------------------------------------------------------------------------|-------------------------------------------------------------------------------------------------------------------------------|
|                                           |                                                                                                                                                                  | <p>trying to hit it with something).</p> <p>3 – Interact with it (e.g., touching, petting, etc.).</p> <p>4 – No reaction (e.g., any indifferent action like ignoring them)</p>                        |                                                                                                                               |
| B.5                                       | Do you know of any dogs being killed in your community in the last 6 months?                                                                                     | <p>1 - Yes</p> <p>2 - No</p> <p>3 - Don't know</p>                                                                                                                                                    | <ul style="list-style-type: none"> <li>• If “1”, go to Question B.6.</li> <li>• If “2” or “3”, go to Question C.1.</li> </ul> |
| B.6                                       | Did any of the dogs that were killed have bright colored collars on?                                                                                             | <p>1 - Yes</p> <p>2 - No</p> <p>3 - Don't know</p>                                                                                                                                                    |                                                                                                                               |
| B.7                                       | <p>Do you know why the dogs were killed?</p> <p><i>The surveyor will not give the answer and will not provide any guiding information to the respondent.</i></p> | <p>1 - They bit people.</p> <p>2 - They were sick.</p> <p>3 - They were being a nuisance in the community (e.g., killing chickens, etc.).</p> <p>4 - Don't know</p> <p>5 - Other (please specify)</p> |                                                                                                                               |
| <b>Section C: Health seeking behavior</b> |                                                                                                                                                                  |                                                                                                                                                                                                       |                                                                                                                               |
| C.1                                       | Have you been bitten by a dog with a bright colored collar in the last 4 weeks?                                                                                  | <p>1 - Yes</p> <p>2 - No</p>                                                                                                                                                                          | <ul style="list-style-type: none"> <li>• If “1”, go to Question C.2.</li> <li>• If “2”, go to Question D.1.</li> </ul>        |
| C.2                                       | Why do you think the dog bit you?                                                                                                                                | <p>1 - I tried to chase it away (e.g., throwing something at it or trying to hit it with something)</p> <p>2 - I tried to interact with it (e.g., touching, petting, etc.)</p>                        |                                                                                                                               |

|     |                                                                                                                                                                                            |                                                                                                                                                                                                                                                                                                                |                                                                                                                        |
|-----|--------------------------------------------------------------------------------------------------------------------------------------------------------------------------------------------|----------------------------------------------------------------------------------------------------------------------------------------------------------------------------------------------------------------------------------------------------------------------------------------------------------------|------------------------------------------------------------------------------------------------------------------------|
|     |                                                                                                                                                                                            | <p>3 - It just bit me for no reason.</p> <p>4 - Other (please specify).</p>                                                                                                                                                                                                                                    |                                                                                                                        |
| C.3 | <p>Did you go for treatment at a healthcare facility after the bite?</p> <p><i>If the respondent answers "No" they will be advised to seek primary healthcare as soon as possible.</i></p> | <p>1 - Yes</p> <p>2 - No</p>                                                                                                                                                                                                                                                                                   | <ul style="list-style-type: none"> <li>• If "1", go to Question C.4.</li> <li>• If "2", go to Question C.5.</li> </ul> |
| C.4 | <p>Why did you decide to go for treatment?</p>                                                                                                                                             | <p>1 - It was a severe bite wound and I needed a doctor/nurse to provide treatment.</p> <p>2 - I was afraid of getting sick from the dog bite and wanted treatment.</p> <p>3 - A community member told me to go.</p> <p>4 - Other reason (please specify)</p>                                                  | <ul style="list-style-type: none"> <li>• Go to Question D.1.</li> </ul>                                                |
| C.5 | <p>Why did you decide <u>not</u> to go for treatment?</p>                                                                                                                                  | <p>1 - Dogs with the bright collars are safe.</p> <p>2 - Dogs with ANY collars are safe.</p> <p>2 - The treatment is too expensive or inaccessible (facility too far away).</p> <p>3 - It was not a severe bite, and I did not think treatment was needed.</p> <p>4 - I used traditional remedies instead.</p> | <ul style="list-style-type: none"> <li>• Go to Question D.1</li> </ul>                                                 |

|                                                                                                                                                           |                                                                                                                                |                                                                                                                                   |                                                                                                                                                                        |
|-----------------------------------------------------------------------------------------------------------------------------------------------------------|--------------------------------------------------------------------------------------------------------------------------------|-----------------------------------------------------------------------------------------------------------------------------------|------------------------------------------------------------------------------------------------------------------------------------------------------------------------|
|                                                                                                                                                           |                                                                                                                                | 5 - A community member told me not to go.                                                                                         |                                                                                                                                                                        |
| <b>Section D: Rabies vaccination behavior</b>                                                                                                             |                                                                                                                                |                                                                                                                                   |                                                                                                                                                                        |
| <i>If necessary, the surveyor will inform the respondent that the "rabies vaccination collars" means that the dog has been vaccinated against rabies.</i> |                                                                                                                                |                                                                                                                                   |                                                                                                                                                                        |
| D.1                                                                                                                                                       | Do you own any dogs?                                                                                                           | 1 - Yes<br>2 - No                                                                                                                 | <ul style="list-style-type: none"> <li>• If "1", go to Question D.2.</li> <li>• If "2", go to Question D.18.</li> </ul>                                                |
| D.2                                                                                                                                                       | If yes, how many dogs do you own?                                                                                              | Free answer                                                                                                                       |                                                                                                                                                                        |
| D.3                                                                                                                                                       | Have your dog(s) been vaccinated against rabies <u>this year</u> ?                                                             | 1 - Yes, all the dogs.<br>2 - Yes, but only some of the dogs.<br>3 - No, none of the dogs.<br>4 - I don't know                    | <ul style="list-style-type: none"> <li>• If "1" or "2", go to Question D.4.</li> <li>• If "3", go to Question D.17.</li> <li>• If "4", go to Question D.18.</li> </ul> |
| D.4                                                                                                                                                       | Did you get a free collar for your dog(s) from the vaccinator?                                                                 | 1 - Yes<br>2 - No                                                                                                                 | <ul style="list-style-type: none"> <li>• If "1", go to Question D.5.</li> <li>• If "2", go to Question D.15.</li> </ul>                                                |
| D.5                                                                                                                                                       | Did getting a free collar for your dog(s) make you more likely to take your dog(s) for rabies vaccination?                     | 1 – Yes<br>2 – No<br>3 – Don't know                                                                                               |                                                                                                                                                                        |
| D6.                                                                                                                                                       | Is it important to you that the collar is a sign that the dog had been vaccinated against rabies specifically?                 | 1 – Yes<br>2 – No<br>3 – Don't know                                                                                               |                                                                                                                                                                        |
| D.7                                                                                                                                                       | How long ago did the dog(s) receive the collars?<br><br><i>The surveyor will help the participant determine the timeframe.</i> | 1 – Less than a week ago.<br>2 - 1 week ago<br>3 – 2 weeks ago<br>4 – 3 weeks ago<br>5 – 4 weeks ago<br>6 – more than a month ago |                                                                                                                                                                        |

|      |                                                                                                                                                                                                      |                                                                                                                                                                                                                             |                                                                                                                                                                         |
|------|------------------------------------------------------------------------------------------------------------------------------------------------------------------------------------------------------|-----------------------------------------------------------------------------------------------------------------------------------------------------------------------------------------------------------------------------|-------------------------------------------------------------------------------------------------------------------------------------------------------------------------|
| D.8  | Does your dog(s) still have the collar on?                                                                                                                                                           | 1 - Yes, all the dogs.<br>2 - Yes, but only some of the dogs.<br>3 - No, none of the dogs.                                                                                                                                  | <ul style="list-style-type: none"> <li>• If “1”, go to Question D.14.</li> <li>• If “2” or 3, go to Question D.9.</li> </ul>                                            |
| D.9  | How long did the dog wear the collar for?<br><br><i>The surveyor will help the participant determine the timeframe. If multiple dogs have lost their collars, the average time must be selected.</i> | 1 – Less than a week<br>2 - 1 week<br>3 – 2 weeks<br>4 – 3 weeks<br>5 – 4 weeks<br>6 – More than a month<br>7 – Don’t know                                                                                                  |                                                                                                                                                                         |
| D.10 | Who removed the collar?<br><br><i>The surveyor will clearly specify that nobody will be identified as there will be no repercussions.</i>                                                            | 1 - The owner<br>2 – The dog<br>3 – Someone in the community<br>4 - Unknown                                                                                                                                                 | <ul style="list-style-type: none"> <li>• If “1”, go to Question D.11.</li> <li>• If “2”, go to Question D.13.</li> <li>• If “3” or “4”, go to Question D.14.</li> </ul> |
| D.11 | Why did you remove the collar(s)?                                                                                                                                                                    | 1 - The dog(s) did not like wearing the collar(s).<br>2 - To use the collar(s) for other purposes.<br>3 – I did not want my dog(s) to wear a collar(s),<br>4 – The collar was hurting my dog.<br>5 – Other (Please specify) |                                                                                                                                                                         |
| D.12 | Was it easy to remove the collar?                                                                                                                                                                    | 1 – Yes<br>2 - No                                                                                                                                                                                                           | <ul style="list-style-type: none"> <li>• Go to question D.14</li> </ul>                                                                                                 |
| D.13 | If possible, please explain how the dog removed the collar.                                                                                                                                          | Free answer                                                                                                                                                                                                                 | <ul style="list-style-type: none"> <li>• Go to question D.14</li> </ul>                                                                                                 |

|      |                                                                                              |                                                                                                                                                                                                                                                                     |                                                                                                                                  |
|------|----------------------------------------------------------------------------------------------|---------------------------------------------------------------------------------------------------------------------------------------------------------------------------------------------------------------------------------------------------------------------|----------------------------------------------------------------------------------------------------------------------------------|
| D.14 | What can be done to improve the collar / make you more likely to keep the collar on the dog? | Free answer                                                                                                                                                                                                                                                         | <ul style="list-style-type: none"> <li>Go to question D.18</li> </ul>                                                            |
| D.15 | Why did you not get a free collar for the dog?                                               | <p>1 – The vaccinator did not offer me a collar for my dog(s).</p> <p>2 – My dog(s) ran away before the collar could be put on.</p> <p>3 – I did not want to put a collar on my dog(s).</p> <p>4 – Other reason.</p>                                                | <ul style="list-style-type: none"> <li>If “1” or “2”, go to Question D.18</li> <li>If “3” or “4”, go to Question D.16</li> </ul> |
| D.16 | Why did you not want a free collar for your dog?                                             | <p>1 - The dog(s) will not like wearing the collar(s).</p> <p>2 - I did not want my dog(s) to wear a collar(s).</p> <p>3 – The collar was going to hurt my dog.</p> <p>5 – Other (Please specify)</p>                                                               | <ul style="list-style-type: none"> <li>Go to Question D.18.</li> </ul>                                                           |
| D.17 | What is the <u>main reason</u> for why you did <u>not</u> take your dog(s) for vaccination?  | <p>1 - I want my dog(s) to be healthy and the vaccine makes them sick.</p> <p>2 – The vaccine changes the behavior of dogs (e.g., happy dogs become aggressive).</p> <p>3 - Because I was told not to do it by someone in my community.</p> <p>4 - I don't know</p> |                                                                                                                                  |

|      |                                                                                                                                                                                                                                                     |                                                                                                                                                                                          |                                                                                                                   |
|------|-----------------------------------------------------------------------------------------------------------------------------------------------------------------------------------------------------------------------------------------------------|------------------------------------------------------------------------------------------------------------------------------------------------------------------------------------------|-------------------------------------------------------------------------------------------------------------------|
|      |                                                                                                                                                                                                                                                     | 5 - Other (please specify)                                                                                                                                                               |                                                                                                                   |
| D.18 | <p>Have you seen anyone removing the bright colored collars from their dogs in the community?</p> <p><i>The surveyor will clearly specify that this is a "Yes/No" answer only. Nobody will be identified as there will be no repercussions.</i></p> | <p>1 - Yes</p> <p>2 - No</p>                                                                                                                                                             | <ul style="list-style-type: none"> <li>• If "1", go to Question D.20.</li> <li>• If "2", Finish survey</li> </ul> |
| D.19 | Do you know why the collars were removed?                                                                                                                                                                                                           | <p>1 - The dog(s) did not like the collar.</p> <p>2 - To use the collars for other purposes.</p> <p>3 - The people did not want their dogs to wear collars.</p> <p>4 - I don't know.</p> | <ul style="list-style-type: none"> <li>• Finish survey</li> </ul>                                                 |
