# Supplementary material for: The Use of Dog Collars Offers Significant Benefits to Rabies Vaccination Campaigns: The Case of Zanzibar, Tanzania
Source: MDPI journal article supplement (doi:10.3390/tropicalmed8080421), 2023-08-21
Supplement: s1 [file s1]

### Supplementary file 3.

#### Supplementary tables derived from the data collected in this study.

**Table S1.** Univariate and multivariable logistic regression analysis of the association between the socio-demographic variables and “feeling safer when encountering a dog with a collar”.

| Variable             | Categories | Feeling safer when encountering a dog with a collar * |     | Total | OR (95% CI)                  | aOR (95% CI)                |
|----------------------|------------|-------------------------------------------------------|-----|-------|------------------------------|-----------------------------|
|                      |            | Yes                                                   | No  |       |                              |                             |
|                      |            |                                                       |     |       |                              |                             |
| Sex                  | Female     | 71                                                    | 80  | 151   | Reference                    | Reference                   |
|                      | Male       | 270                                                   | 179 | 449   | 1.6996<br>(1.1725 - 2.4636)  | 1.4640<br>(0,9771 - 2,1937) |
| Age                  | 18 – 29    | 120                                                   | 101 | 221   | Reference                    | Reference                   |
|                      | 30 – 39    | 99                                                    | 62  | 161   | 1.3440<br>(0.8890 - 2.0318)  |                             |
|                      | 40 – 49    | 59                                                    | 41  | 100   | 1.2112<br>(0.7507 - 1.9542)  |                             |
|                      | 50 - 60    | 35                                                    | 36  | 71    | 0.8183<br>(0.4791 - 1.3976)  |                             |
|                      | >60        | 28                                                    | 19  | 47    | 1.2404<br>(0.6541 - 2.3520)  |                             |
| Setting              | Urban      | 95                                                    | 126 | 221   | Reference                    | Reference                   |
|                      | Rural      | 246                                                   | 133 | 379   | 2.4532<br>(1.7465- 3.4457)   | 2.8355<br>(1,9424 - 4,1393) |
| Dog ownership status | No         | 190                                                   | 235 | 425   | Reference                    | Reference                   |
|                      | Yes        | 151                                                   | 24  | 175   | 7.7818<br>(4.8576 - 12.4664) | 8.1235<br>(4.9857- 13.2363) |

OR: Odds Ratio.

aOR: Adjusted Odds Ratio.

CI: Confidence interval.

\* Predictor variables retained in the multivariable logistic regression analysis: ‘Dog ownership status’ and ‘Setting’

**Table S2.** Univariate and multivariable logistic regression analysis of the association between the socio-demographic variables and “feeling less safe when encountering a dog without a collar”.

| Variable             | Categories | Feeling less safe when encountering a dog without a collar * |     | Total | OR (95% CI)                 | aOR (95% CI)                |
|----------------------|------------|--------------------------------------------------------------|-----|-------|-----------------------------|-----------------------------|
|                      |            | Yes                                                          | No  |       |                             |                             |
|                      |            |                                                              |     |       |                             |                             |
| Sex                  | Female     | 96                                                           | 55  | 151   | Reference                   |                             |
|                      | Male       | 302                                                          | 147 | 449   | 1.1770<br>(0.8004 - 1.7309) |                             |
| Age                  | 18 – 29    | 148                                                          | 73  | 221   | Reference                   |                             |
|                      | 30 – 39    | 108                                                          | 53  | 161   | 1.0051<br>(0.6525 - 1.5482) |                             |
|                      | 40 – 49    | 63                                                           | 37  | 100   | 0.8398<br>(0.5128 - 1.3755) |                             |
|                      | 50 - 60    | 45                                                           | 26  | 71    | 0.8537<br>(0.4885 - 1.4920) |                             |
|                      | >60        | 34                                                           | 13  | 47    | 1.2900<br>(0.6419 - 2.5924) |                             |
| Setting              | Urban      | 120                                                          | 101 | 221   | Reference                   | Reference                   |
|                      | Rural      | 278                                                          | 101 | 379   | 2.3167<br>(1.6339 - 3.2847) | 2.3564<br>(1.6458 - 3.3737) |
| Dog ownership status | No         | 254                                                          | 171 | 425   | Reference                   | Reference                   |
|                      | Yes        | 144                                                          | 31  | 175   | 3.1273<br>(2.0266 - 4.8257) | 3.1786<br>(2.0448 - 4.9410) |

OR: Odds Ratio.

aOR: Adjusted Odds Ratio.

CI: Confidence interval.

\* Predictor variables retained in the multivariable logistic regression analysis: ‘Sex’ and ‘Dog ownership status’

**Table S3.** Health seeking behavior in response to dog bites.

| <b>Characteristic</b>                                                                               | <b>Frequency<br/><i>n</i> (%)</b> |
|-----------------------------------------------------------------------------------------------------|-----------------------------------|
| <b>Respondents bitten by dogs in 4 weeks leading up to survey<br/>(respondents, <i>n</i> = 600)</b> |                                   |
| Yes                                                                                                 | 8 (1.33)                          |
| No                                                                                                  | 592 (98.67)                       |
| <b>Reason why the dog bit the respondent (respondents, <i>n</i> = 8)</b>                            |                                   |
| Tried to chase the dog away                                                                         | 1 (12.50)                         |
| Tried to interact with the dog                                                                      | 5 (62.50)                         |
| No obvious reason                                                                                   | 2 (25.00)                         |
| <b>Respondents who sought treatment after exposure (respondents, <i>n</i> = 8)</b>                  |                                   |
| Yes                                                                                                 | 6 (75.00)                         |
| No                                                                                                  | 2 (25.00)                         |
| <b>Reason respondents sought treatment after exposure (respondents, <i>n</i> = 6)</b>               |                                   |
| Bite wound that needed treatment                                                                    | 1 (16.67)                         |
| Rabies treatment specifically                                                                       | 4 (66.67)                         |
| Suggested by a community member                                                                     | 1 (16.67)                         |
| <b>Reason respondents did not seek treatment after exposure (respondents, <i>n</i> = 2)</b>         |                                   |
| Dogs with the bright collars are safe                                                               | 0 (0.00)                          |
| Dogs with any collars are safe                                                                      | 0 (0.00)                          |
| Treatment too expensive                                                                             | 1 (50.00)                         |
| Traditional remedies were used                                                                      | 0 (0.00)                          |
| The exposure was not severe                                                                         | 1 (50.00)                         |

**Table S4.** Univariate and multivariable logistic regression analysis of the association between the socio-demographic variables and “being more likely to take dogs for vaccination if collars are given”.

| Variable | Categories | Being more likely to take dogs for vaccination if collars are given* |    | Total | OR (95% CI)                     | aOR (95% CI)         |
|----------|------------|----------------------------------------------------------------------|----|-------|---------------------------------|----------------------|
|          |            | Yes                                                                  | No |       |                                 |                      |
|          |            |                                                                      |    |       |                                 |                      |
| Sex      | Male       | 71                                                                   | 51 | 122   | Reference<br>56.9223            |                      |
|          | Female     | 20                                                                   | 0  | 20    | (3.3651 -<br>962.875)           |                      |
| Age      | 18 – 29    | 39                                                                   | 26 | 65    | Reference<br>0.8889             |                      |
|          | 30 – 39    | 24                                                                   | 18 | 42    | (0.4045 - 1.9532)               |                      |
|          | 40 – 49    | 7                                                                    | 4  | 11    | 1.1667<br>(0.3101 - 4.3889)     |                      |
|          | 50 - 60    | 14                                                                   | 2  | 16    | 4.6667<br>(0.9782 -<br>22.2638) |                      |
|          | >60        | 7                                                                    | 1  | 8     | 4.6667<br>(0.5418 -<br>40.1947) |                      |
| Setting  | Urban      | 37                                                                   | 3  | 40    | Reference<br>0.0912             | Reference<br>0,1082  |
|          | Rural      | 54                                                                   | 48 | 102   | (0.0264 –<br>0.3149)            | (0,0306 –<br>0,3823) |

OR: Odds Ratio.

aOR: Adjusted Odds Ratio.

CI: Confidence interval.

\* Predictor variables retained in the multivariable logistic regression analysis: ‘Sex’.
